# Supplementary material for: Multi-scenario urban flood risk assessment by integrating future land use change models and hydrodynamic models
Source: Copernicus journal article supplement (doi:10.5194/nhess-22-3815-2022), 2022-11-28
Supplement: Supplementary file 1 [file nhess-22-3815-2022-supplement.pdf]

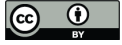

*Supplement of*

## **Multi-scenario urban flood risk assessment by integrating future land use change models and hydrodynamic models**

**Qinke Sun et al.**

*Correspondence to:* Jiayi Fang (jyfang822@foxmail.com) and Min Liu (mliu@geo.ecnu.edu.cn)

The copyright of individual parts of the supplement might differ from the article licence.

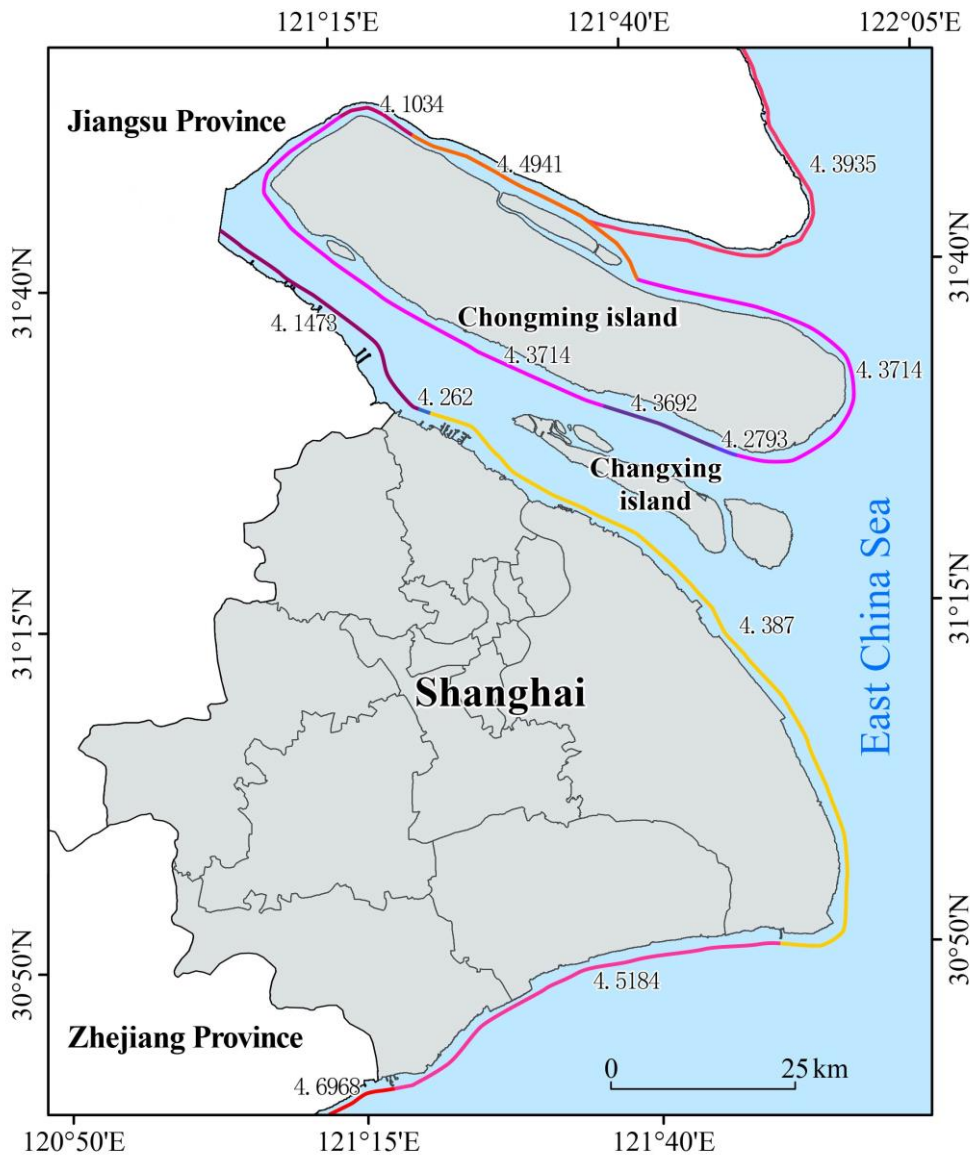

14

15 **Figure S1: Visualization of GTSR data in Shanghai.**

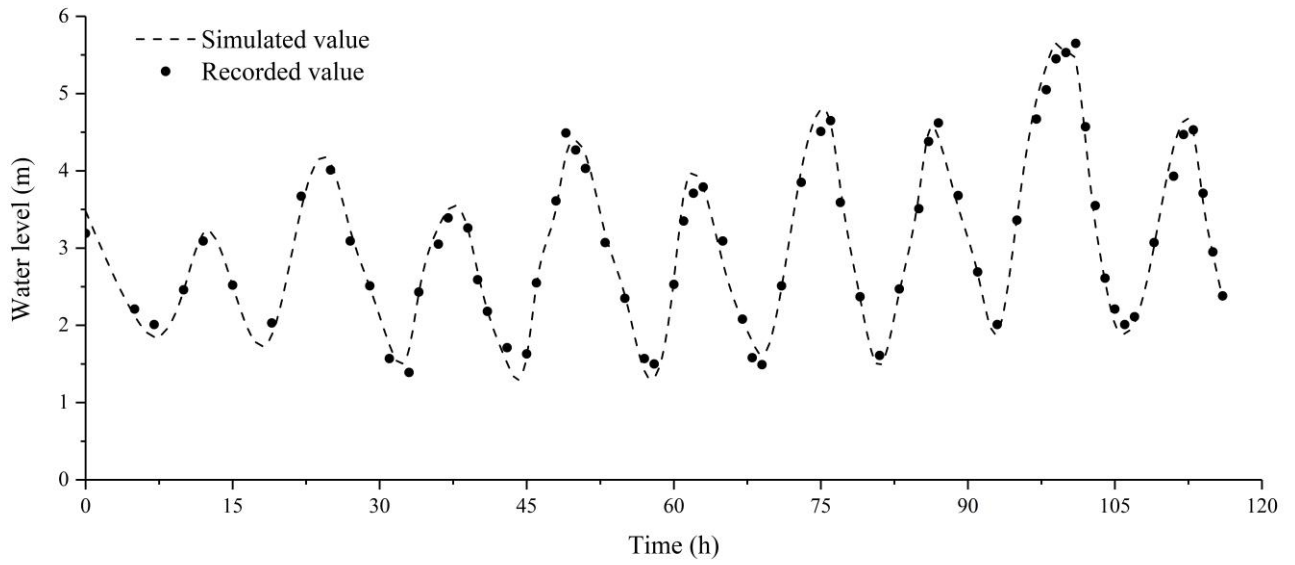

16

17 **Figure S2: Comparison between the recorded and simulated values at the Huangpu Park tidal station.**

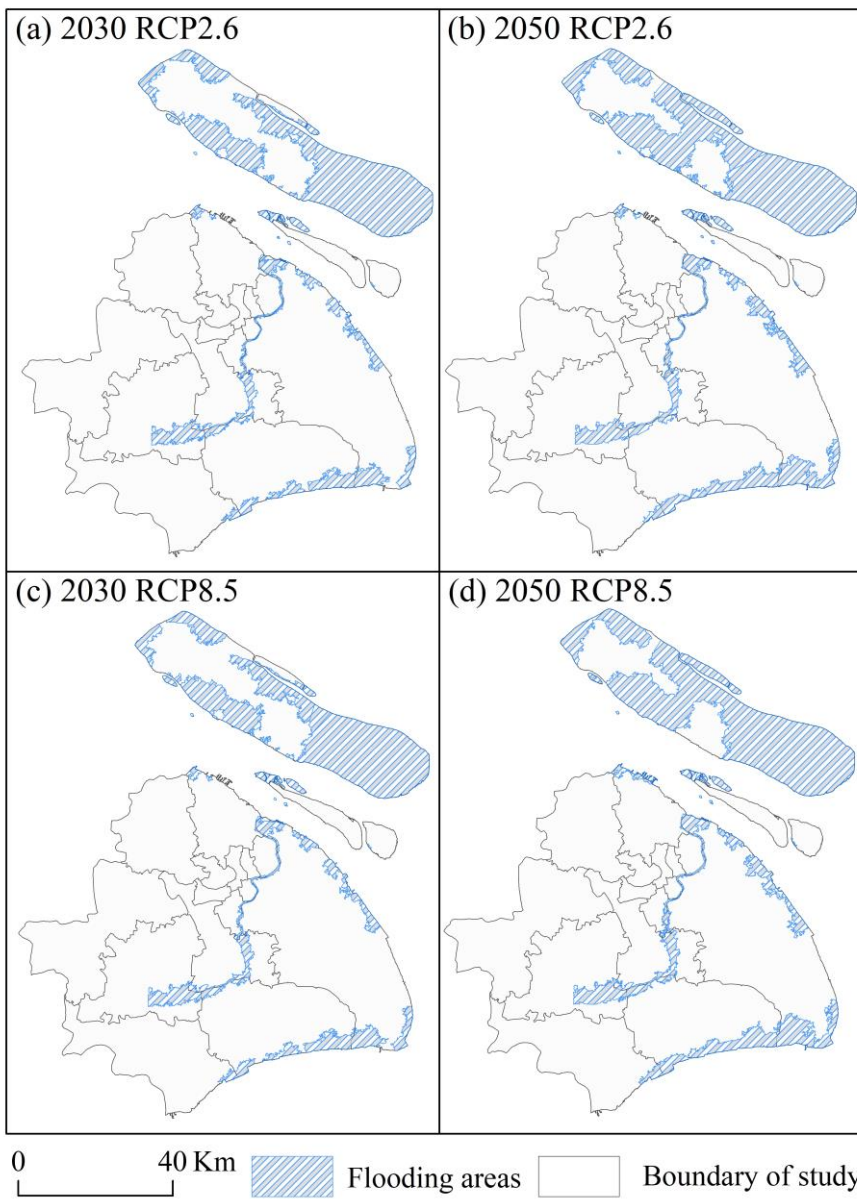

18

19 **Figure S3: The flood inundation in RCP2.6 and RCP8.5 scenarios.**

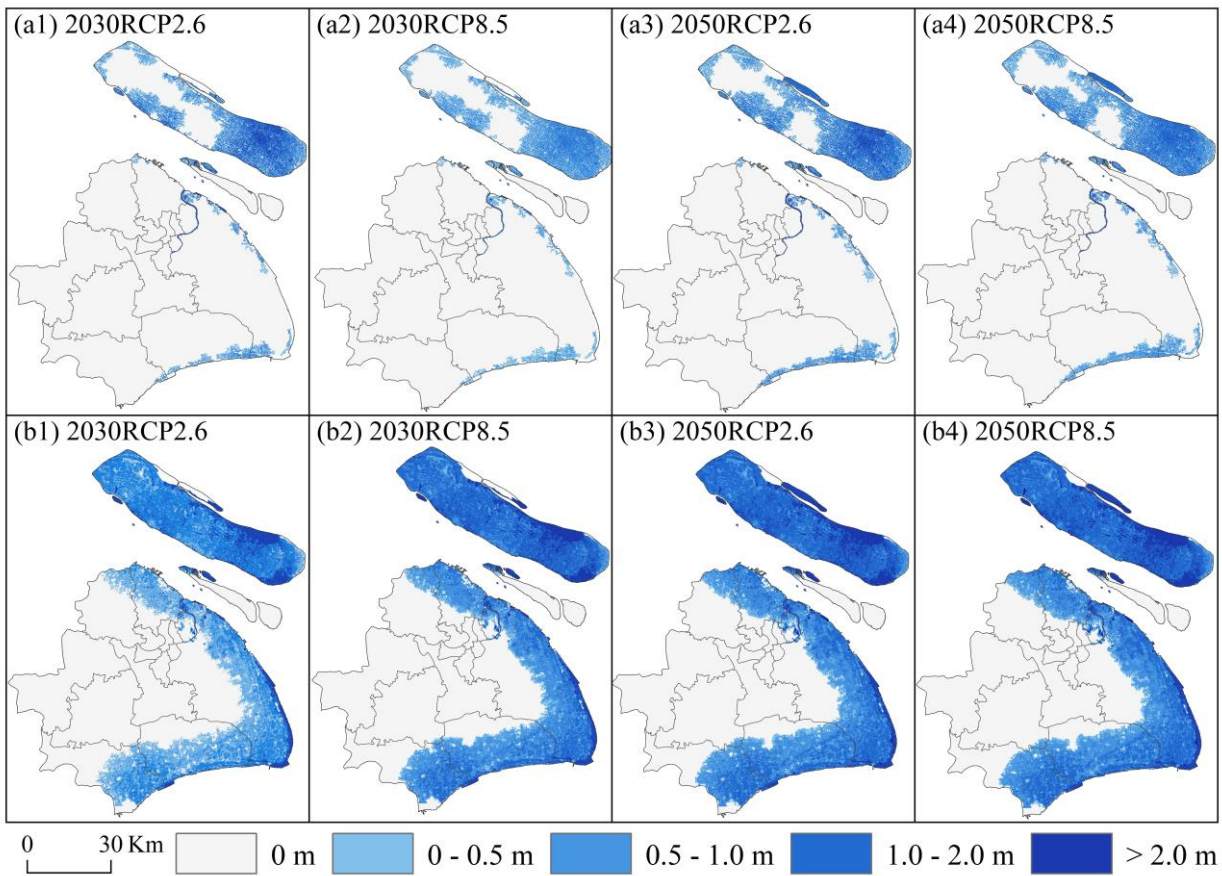

20

21 **Figure S4: Inundation effects of coastal flooding in Shanghai. (a) presents the inundation results under the protection of flood wall,**

22 **(b) presents the inundation results without flood wall.**
